# Supplementary material for: NtMYB3, an R2R3-MYB from Narcissus, Regulates Flavonoid Biosynthesis
Source: PubMed Central journal article supplement (PMC6862390; doi:10.3390/ijms20215456), 2019-11-01
Supplement: ijms-20-05456-s001.pdf [file ijms-20-05456-s001.pdf]

# *NtMYB3*, an R2R3-MYB from *Narcissus*, Regulates Flavonoid Biosynthesis

Muhammad Anwar <sup>1,†</sup>, Weijun Yu <sup>1,†</sup>, Hong Yao <sup>1</sup>, Ping Zhou <sup>1</sup>, Andrew C. Allan <sup>2,3</sup>, and Lihui Zeng <sup>1,\*</sup>

<sup>1</sup> College of Horticulture, Fujian Agriculture and Forestry University, Fuzhou 35002, China; anwar\_uar@yahoo.com (M.A.); ywj973618858@hotmail.com (W.Y.); yaohong116@hotmail.com (H.Y.); zhoup1249897684@hotmail.com (P.Z.)

<sup>2</sup> The New Zealand Institute for Plant & Food Research, Mt Albert Research Centre, Private Bag 92169, Auckland, 1025 New Zealand; andrew.allan@plantandfood.co.nz

<sup>3</sup> School of Biological Sciences, University of Auckland, Private Bag 92019, Auckland 1142, New Zealand

\* Correspondence: lhzen@hotmail.com Tel.: +86-591-83789450

† These authors contributed equally to this work.

## Supplementary Material

**Supplemental Table 1.** Analysis of putative cis-acting elements in *NtFLS* promoter.

| Motif                  | Function                                                               | Stand | Position <sup>a</sup>                                             | Position(5' - 3')              |
|------------------------|------------------------------------------------------------------------|-------|-------------------------------------------------------------------|--------------------------------|
| 5' UTR Py-rich stretch | <i>cis</i> -acting element conferring high transcription levels        | +     | -552                                                              | TTTCTCTC<br>TCTCTC             |
| TATA-box               | core promoter element around -30 of transcription start                | +     | -831, -884,<br>-895, -908, 900<br>-883, -909<br>-908              | TATA<br>ATATAT<br>TATATA       |
|                        |                                                                        | -     | -63<br>-63<br>-908                                                | TATA<br>TATAA<br>TATATAA       |
| CAAT-box               | common <i>cis</i> -acting element in promoter and enhancer regions     | +     | -446                                                              | CCAAT                          |
|                        |                                                                        | -     | -627, -832,<br>-466<br>-515<br>-910, -860,<br>-619, -650,<br>-331 | CAAT<br>CAAAT<br>CAAT<br>CAAAT |
| 3-AF1 binding site     | Light responsive element                                               | -     | -421                                                              | TAAGAGA<br>GGAA                |
| Box II                 | part of a light responsive element                                     | +     | -213                                                              | CCACGTGG<br>C                  |
| G-Box                  | <i>cis</i> -acting regulatory element involved in light responsiveness | -     | -215                                                              | CACGTG                         |
| G-box                  | <i>cis</i> -acting regulatory element involved in light responsiveness | +     | -81                                                               | CACGTG                         |
| TCT-motif              | part of a light responsive element                                     | +     | -402                                                              | TCTTAC                         |
| ACE                    | <i>cis</i> -acting element involved in light responsiveness            | -     | -107                                                              | ACTACGTT<br>GG                 |
| Box I                  | Light responsive element                                               | +     | -199                                                              | TTTCAAA                        |
| Myb-binding site       | MYB combination element                                                | +     | -682                                                              | CAACAG                         |
| MYB                    | MYB combination element                                                | +     | -682                                                              | CAACAG                         |

|                 |                                                                     |   |           |                  |
|-----------------|---------------------------------------------------------------------|---|-----------|------------------|
| ABRE            | cis-acting element involved in the abscisic acid responsiveness     | + | -215      | ACGTG            |
|                 |                                                                     | - | -106, -82 | ACGTG            |
| ABRE2           |                                                                     | - | -214      | CCACGTGG         |
| ABRE3a          |                                                                     | - | 105       | TACGTG           |
| ABRE4           |                                                                     | + | 105       | CACGTA           |
|                 |                                                                     | - | -140      | CAACCA           |
| P-box           | Gibberellin response element                                        | - | -354      | GACCAAA<br>CTCGT |
| O2-site         | cis-acting regulatory element involved in zen metabolism regulation | - | -532      | GATGATAT<br>GC   |
| TC-rich repeats | cis-acting element involved in defense and stress responsiveness    | + | -497      | ATTCTCTA<br>AC   |
|                 |                                                                     | + | -407      | GTTTTCTT<br>AC   |
| CAT-box         | cis-acting regulatory element related to meristem expression        | + | -313      | GCCACT           |
| Skn-1_motif     | cis-acting regulatory element required for endosperm expression     | - | -825      | GTCAT            |

Supplemental Table 2. List of primers used in this studies.

| Name                | Forward primer (5' to 3')                     | Reverse primer (5' to 3')                       | Note                          |
|---------------------|-----------------------------------------------|-------------------------------------------------|-------------------------------|
| <i>MYB3</i>         | AATATGGGTAGGTCTCCTTGTT<br>GTG                 | GATTACAGGACACGCAAAGTAAATCTA                     | Cloning of full length of ORF |
| pSAK- <i>MYB3</i>   | TGGATCCAAAGAATTCAATAT<br>GGGTAGGTCTCCTTGTTGTG | TACTCTCGAGAAGCTTGATTACAGGAC<br>ACGCAAAGTAAATCTA | Vector construction           |
| QRT<br><i>NtCHS</i> |                                               | AAATTGCCTCTCTTGAGATCGG<br>ACCTATAATGACCGCGGCTG  |                               |
| <i>NtCHI</i>        | TGGGTAGGTCTCCTTGTT                            | CAACGTTGACAACATCAGGC                            |                               |
| <i>NtF3H</i>        | ACTCCGGATGGCTAAGGACTG<br>TG                   | CCTTGGTTAAGGCCTCCTTC                            |                               |
| <i>NtFLS</i>        | GAAATCCTCCGATCCAGTGA<br>ACAGGGTGAAGTGGTCCAAG  | TCCCTGTAGGAGGGAGGATT                            |                               |
| <i>NtLAR</i>        | GAACTTGAAGGGAAAAGGGG<br>TCAAGGTCCTTTACGCCATC  | ACGAACCTGCTTCTCTTTGG                            | qRT-PCR analysis              |
| <i>NtANR</i>        | CATTTGACTTTCCCAAACGC<br>GGGAATGAAGCTCACTACAGC | ATTGGGCTTTTGAGTTGTGC                            |                               |
| <i>NtDFR</i>        | GAGTGCATTGGATGCCTTTT<br>TGCGTTGAAGCTCATACTG   | ACTCCGGCCATTTCTCTTGG                            |                               |
| <i>NtUFGT</i>       | AATGGAAGTGAATGGTCAAG<br>GC                    | CCAGCTCCATTAGGTCCTTG                            |                               |
| <i>NtANS</i>        |                                               | GGAATTAGGCACACACTTGC                            |                               |
| <i>NtACT</i>        |                                               | TGCCAGATCTTCTCCATGTCATCCCA                      |                               |
